# Supplementary material for: Unraveling the Antibacterial Mechanism of Plasma-Activated Lactic Acid against Pseudomonas ludensis by Untargeted Metabolomics
Source: MDPI journal article supplement (doi:10.3390/foods12081605), 2023-04-10
Supplement: s1 [file s1]

# Unraveling the antibacterial mechanism of Plasma-activated lactic acid against *Pseudomonas ludensis* by untargeted metabolomics

Zhaobin Wang<sup>1</sup>, Xiaoting Wang<sup>2</sup>, Xiaowei Sheng<sup>1</sup>, Luling Zhao<sup>1</sup>, Jing Qian<sup>1</sup>, Jianhao Zhang<sup>1,\*</sup> and Jin Wang<sup>3,\*</sup>

<sup>1</sup> National Center of Meat Quality and Safety Control, Collaborative Innovation Center of Meat Production and Processing, Quality and Safety Control, College of Food Science and Technology, Nanjing Agricultural University, Nanjing 210095, China

<sup>2</sup> College (School) of Food and Drug, Luoyang Normal University, Luoyang 471934, China

<sup>3</sup> Key Laboratory of Environmental Medicine and Engineering, Ministry of Education, and Department of Nutrition and Food Hygiene, School of Public Health, Southeast University, Nanjing 210009, China

<sup>1,\*</sup> Correspondence: nau\_zjh@njau.edu.cn

<sup>3,\*</sup> Correspondence: jin.wang6@mail.mcgill.ca

**Table S1.** Differential metabolites of PALA treated *P. ludensis* identified through untargeted metabolomics

| Serial number | Name                                                                   | Log2 (T/CK) | P-value  | VIP    |
|---------------|------------------------------------------------------------------------|-------------|----------|--------|
| 1             | 3-[4-(3,5-dichloro-4-pyridinyl) piperazino]-1,1,1-trifluoro-2-propanol | -3.08       | 1.45E-05 | 1.0053 |
| 2             | Maltopentaose                                                          | -6          | 5.00E-09 | 1.9066 |
| 3             | γ-Glutamylcysteine                                                     | -8.06       | 9.58E-08 | 2.5691 |
| 4             | Adenosine                                                              | -3.53       | 8.65E-06 | 1.1434 |
| 5             | L-Homocitrulline                                                       | -5.91       | 2.47E-07 | 1.8878 |
| 6             | Xanthosine                                                             | -6.54       | 9.26E-06 | 2.1513 |
| 7             | Reduced nicotinamide adenine dinucleotide                              | -5.56       | 1.36E-06 | 1.7552 |
| 8             | D-α-Hydroxyglutaric acid                                               | -7.76       | 2.53E-07 | 2.4907 |
| 9             | Gamma-Glu-Leu                                                          | -5.7        | 1.41E-06 | 1.8345 |
| 10            | D-Ribose                                                               | -3.84       | 5.28E-08 | 1.2234 |
| 11            | S-Adenosylhomocysteine                                                 | -7.52       | 5.44E-05 | 2.4119 |
| 12            | N-Acetylaspartic acid                                                  | -8.23       | 1.33E-09 | 2.6149 |
| 13            | Ranolazine                                                             | -5.94       | 1.43E-06 | 1.9073 |
| 14            | D-(-)-Fructose                                                         | -4.74       | 4.52E-09 | 1.5041 |
| 15            | 2-Methylbutyric acid                                                   | 2.2         | 0.013751 | 1.0636 |
| 16            | Inosine                                                                | -3.49       | 6.19E-06 | 1.1224 |
| 17            | N6-Succinyl Adenosine                                                  | -5.87       | 6.85E-09 | 1.8689 |
| 18            | Nicotinamide adenine dinucleotide (NAD+)                               | -5.02       | 4.14E-06 | 1.6248 |
| 19            | Nitrofurantoin                                                         | -6.12       | 2.14E-06 | 1.956  |
| 20            | DL-Glyceraldehyde3-phosphate                                           | -3.56       | 5.67E-07 | 1.134  |
| 21            | Retrorsine                                                             | -5.03       | 8.21E-07 | 1.5988 |
| 22            | L (+)-Ornithine                                                        | -4.91       | 1.05E-06 | 1.5739 |
| 23            | Uridine                                                                | -5.12       | 1.68E-05 | 1.6898 |
| 24            | N6-Acetyl-L-lysine                                                     | -8.77       | 1.51E-08 | 2.7963 |
| 25            | Pantothenic acid                                                       | -6.67       | 3.07E-07 | 2.1411 |
| 26            | (R)-3-Hydroxy myristic acid                                            | -3.87       | 0.000631 | 1.3559 |
| 27            | DL-Norvaline DL                                                        | -3.09       | 9.76E-05 | 1.0253 |
| 28            | 2'-Deoxycytidine                                                       | -4.72       | 4.98E-06 | 1.5255 |
| 29            | 2-(acetylamino)-3-(1H-indol-3-yl) propanoic acid                       | -7.79       | 1.31E-10 | 2.474  |

|    |                                                                        |       |          |        |
|----|------------------------------------------------------------------------|-------|----------|--------|
| 30 | 7-methylpyrimido[4,5-d] pyrimidin-4-amine                              | -4.83 | 4.38E-06 | 1.5551 |
| 31 | L-(+)-Citrulline                                                       | -4.48 | 7.65E-06 | 1.4475 |
| 32 | 2'-Deoxyinosine                                                        | -8.86 | 9.98E-07 | 2.8932 |
| 33 | 4-Butylresorcinol                                                      | -6.82 | 5.73E-07 | 2.1732 |
| 34 | Cyclic ADP-ribose                                                      | -4.88 | 8.48E-08 | 1.5576 |
| 35 | N-Acetylglycine                                                        | -5.09 | 1.38E-05 | 1.6626 |
| 36 | 2-Isopropylmalic acid                                                  | -6.8  | 1.01E-09 | 2.1624 |
| 37 | N-Acetylornithine                                                      | -7.67 | 5.72E-07 | 2.4661 |
| 38 | Asp-glu                                                                | -4.74 | 7.36E-07 | 1.4946 |
| 39 | Citric acid                                                            | -6.04 | 3.15E-09 | 1.9228 |
| 40 | L-Glutathione oxidized                                                 | -6.04 | 4.44E-06 | 1.9646 |
| 41 | L-Hydroxyproline                                                       | -3.81 | 3.25E-07 | 1.2094 |
| 42 | mesaconic acid                                                         | -4.75 | 1.22E-08 | 1.5114 |
| 43 | (2E)-1-(2-hydroxy-3,4,5,6-tetramethoxy-phenyl)-3-phenylprop-2-en-1-one | 5.26  | 3.40E-05 | 1.7199 |
| 44 | 6-Methylquinoline                                                      | -3.88 | 6.66E-05 | 1.2836 |
| 45 | L-Glutathione (reduced)                                                | -8.77 | 3.67E-07 | 2.8232 |
| 46 | N-{6-[(7-chloro-4-quinazoliny) oxy]-3-pyridinyl}-4-methoxybenzamide    | -3.7  | 2.19E-05 | 1.1619 |
| 47 | UMP                                                                    | -5.19 | 9.72E-07 | 1.6665 |
| 48 | Cytidine 5'-monophosphate (hydrate)                                    | -5.18 | 3.67E-06 | 1.673  |
| 49 | N-Acetyl-L-tyrosine                                                    | -5.25 | 2.86E-10 | 1.669  |
| 50 | 2-mercapto-4-(2-thienyl)-5,6,7,8-tetrahydro-quinoline-3-carbonitrile   | -4.51 | 1.22E-05 | 1.4531 |
| 51 | D-glutamine                                                            | -3.65 | 2.46E-06 | 1.1675 |
| 52 | Neopterin                                                              | -5.5  | 4.72E-07 | 1.7624 |
| 53 | Adenosine diphosphate (ADP)                                            | -4.11 | 2.85E-06 | 1.3052 |
| 54 | 4-morpholino-3-nitrobenzene-1-sulfonamide                              | -4.94 | 2.56E-05 | 1.5952 |
| 55 | N-[2-(1,5-dimethyl-4-nitro-1H-pyrazol-3-yl) vinyl] -N,N-dimethylamine  | -5.58 | 1.67E-06 | 1.7998 |
| 56 | Epinephrine                                                            | -4.4  | 1.01E-06 | 1.3889 |
| 57 | D-2-Aminoadipic acid                                                   | -5.19 | 1.21E-09 | 1.6471 |
| 58 | 5'-S-Methyl-5'-thioadenosine                                           | -4.57 | 7.93E-08 | 1.4557 |
| 59 | NAD+                                                                   | -4.23 | 4.92E-05 | 1.3695 |
| 60 | 4-cyclopropyl-6-methoxy-1,3,5-triazin-2-amine                          | -4.44 | 1.96E-05 | 1.4491 |
| 61 | RLH                                                                    | 2.93  | 0.003268 | 1.1264 |
| 62 | Epigallocatechin                                                       | -5.35 | 1.52E-06 | 1.7208 |
| 63 | Gedunin                                                                | -5.59 | 1.79E-06 | 1.779  |
| 64 | gamma-Glutamylcysteine                                                 | -5.43 | 6.02E-06 | 1.752  |
| 65 | 2,4-Dihydroxybenzoic acid                                              | -8.43 | 5.61E-10 | 2.6771 |
| 66 | N1-(1H-1,2,3-benzotriazol-5-yl)-3,4,5-trimethoxybenzamide              | 3.51  | 3.17E-05 | 1.1014 |
| 67 | 4-chloro-5-morpholino-2-quinoxalin-2-ylpyridazin-3(2H)-one             | -3.68 | 2.44E-05 | 1.1823 |
| 68 | Guanosine                                                              | -3.39 | 1.23E-06 | 1.0827 |
| 69 | 13,14-Dihydro-15-keto-tetranor prostaglandin F1 $\alpha$               | -3.02 | 0.000786 | 1.0617 |
| 70 | Adenylocuccinic Acid                                                   | -4.85 | 3.26E-07 | 1.5371 |

|     |                                                                          |       |          |        |
|-----|--------------------------------------------------------------------------|-------|----------|--------|
| 71  | Cytidine 5'-Monophosphate-N-Acetylneuraminic Acid                        | -4.9  | 8.21E-06 | 1.559  |
| 72  | FKK                                                                      | -4.79 | 7.97E-06 | 1.5097 |
| 73  | Glycyl-L-leucine                                                         | -5.05 | 9.48E-07 | 1.6217 |
| 74  | $\alpha$ -Lapachone                                                      | -5.12 | 2.49E-06 | 1.638  |
| 75  | 1-(4-methylphenyl)-3-(2-pyridylthio) pyrrolidine-2,5-dione               | -4.39 | 1.16E-07 | 1.3933 |
| 76  | S-Adenosyl-L-methionine                                                  | -3.78 | 7.33E-08 | 1.1988 |
| 77  | $\gamma$ -L-Glutamyl-L-glutamic acid                                     | -4.58 | 6.81E-07 | 1.4647 |
| 78  | 2-[[methyl(2,3,4,5,6-pentahydroxyhexyl)amino] methylidene] malononitrile | -4.52 | 1.90E-06 | 1.4438 |
| 79  | HKK                                                                      | -3.87 | 8.55E-08 | 1.2272 |
| 80  | S-Lactoylglutathione                                                     | -3.42 | 0.000129 | 1.1203 |
| 81  | 5-Hydroxytryptophan                                                      | -4.34 | 1.78E-06 | 1.3935 |
| 82  | N8-Acetylspermidine                                                      | -4.77 | 3.63E-06 | 1.533  |
| 83  | [4-(1H-indol-4-yl)piperazino](2-thienyl)methanone                        | -6.48 | 2.14E-10 | 2.0592 |
| 84  | Uridine monophosphate (UMP)                                              | -5.73 | 8.31E-08 | 1.814  |
| 85  | L-Glutamic acid                                                          | -4.37 | 2.34E-06 | 1.3952 |
| 86  | Kynurenic acid O-hexside                                                 | -3.96 | 3.73E-07 | 1.2516 |
| 87  | S-(Methyl)Glutathione                                                    | -7.51 | 1.51E-06 | 2.4253 |
| 88  | Hypoxanthine                                                             | -7.72 | 2.23E-09 | 2.4503 |
| 89  | N,N-dimethyl-5-nitro-6-[3-(trifluoromethyl)phenoxy]pyrimidin-4-amine     | 4.85  | 3.78E-05 | 1.493  |
| 90  | N-Acetyl-DL-glutamic acid                                                | -5.64 | 2.76E-06 | 1.8091 |
| 91  | 5-Methyluridine                                                          | -3.4  | 8.07E-07 | 1.0869 |
| 92  | L-arginine                                                               | -4.05 | 4.42E-07 | 1.2794 |
| 93  | 3-hydroxy-N-(1-hydroxy-4-methylpentan-2-yl)-5-oxo-6-phenylhexanamide     | 4.7   | 9.53E-06 | 1.5178 |
| 94  | Tiglic acid                                                              | -3.71 | 3.35E-05 | 1.2001 |
| 95  | 2'-Deoxyadenosine 5'-monophosphate                                       | -3.66 | 2.92E-06 | 1.1691 |
| 96  | L-Cysteine-glutathione gisulfide                                         | -3.59 | 9.21E-06 | 1.1598 |
| 97  | 2'-Deoxyadenosine 5'-monophosphate (dAMP)                                | -5.65 | 5.51E-09 | 1.7961 |
| 98  | 2-(Formylamino)Benzoic Acid                                              | -4.54 | 1.40E-05 | 1.4761 |
| 99  | 3-(5-phenyl-1,3-oxazol-2-yl)-4-(trifluoromethyl)pyridine                 | -4.52 | 1.59E-06 | 1.4441 |
| 100 | 3-Methyladipic acid                                                      | -3.19 | 0.000116 | 1.053  |
| 101 | nor-6 $\beta$ -Oxycodol                                                  | -4.49 | 7.60E-08 | 1.4331 |
| 102 | Ala-Gln                                                                  | -5.35 | 1.42E-06 | 1.7093 |
| 103 | Ethylmalonate                                                            | -7.57 | 8.77E-10 | 2.4063 |
| 104 | Xanthine                                                                 | -4.37 | 0.00028  | 1.5461 |
| 105 | Thymidine                                                                | -8.14 | 1.54E-06 | 2.6583 |
| 106 | 8-Bromoguanosine                                                         | -4.81 | 3.24E-06 | 1.519  |
| 107 | Isophorone                                                               | -3.3  | 3.17E-06 | 1.0419 |
| 108 | DL-Tryptophan                                                            | -4.38 | 3.72E-05 | 1.4448 |
| 109 | Cytosine                                                                 | -6.94 | 7.71E-08 | 2.2138 |
| 110 | Maltotetraose                                                            | -7.12 | 8.78E-08 | 2.2668 |
| 111 | 2'-Deoxyadenosine                                                        | -4.77 | 1.02E-07 | 1.5077 |
| 112 | L-Tyrosine                                                               | -3.79 | 8.31E-05 | 1.2667 |

|     |                                                             |       |          |        |
|-----|-------------------------------------------------------------|-------|----------|--------|
| 113 | gamma-Glutamylleucine                                       | -4.84 | 7.24E-05 | 1.5964 |
| 114 | N-Acetyl-aspartic acid                                      | -5.78 | 5.71E-07 | 1.8523 |
| 115 | 2,6-Dihydroxypurine                                         | -6.34 | 7.69E-07 | 2.0227 |
| 116 | 2-Hydroxycinnamic acid                                      | -3.79 | 3.79E-06 | 1.223  |
| 117 | Adenosine 5'-monophosphate                                  | -5.8  | 2.68E-06 | 1.8729 |
| 118 | N-Acetyl-L-leucine                                          | -5.35 | 6.34E-05 | 1.6743 |
| 119 | 2-Furoic acid                                               | -4.27 | 5.63E-07 | 1.3476 |
| 120 | Guanosine monophosphate                                     | -4.67 | 8.94E-06 | 1.5159 |
| 121 | D-Raffinose                                                 | -5.12 | 0.000112 | 1.752  |
| 122 | N-Acetylvaline                                              | -5.13 | 6.84E-09 | 1.6306 |
| 123 | 2-Aminoadipic acid                                          | -6.46 | 1.88E-08 | 2.0549 |
| 124 | Cys-Gly                                                     | -7.05 | 1.49E-07 | 2.2527 |
| 125 | 4-(trifluoromethyl)nicotinic acid                           | -5.48 | 5.16E-06 | 1.755  |
| 126 | D - (+)-Maltose                                             | -6.41 | 8.05E-06 | 2.1003 |
| 127 | Spermidine                                                  | -4.31 | 0.000136 | 1.4722 |
| 128 | 4-hydroxy-1-methyl-3-(phenylthio)-1,2-dihydroquinolin-2-one | -6.07 | 1.66E-08 | 1.9343 |
| 129 | Pantetheine                                                 | -8.58 | 8.84E-09 | 2.7184 |
| 130 | 2'-Deoxyadenosine-5'-monophosphate                          | -5.02 | 2.27E-06 | 1.6129 |
| 131 | Nicotinamide adenine dinucleotide                           | -5.12 | 7.33E-08 | 1.6314 |

**Note:** Name, name of metabolites; Log2 (T/CK), Log2 values of the ratio of average intensities of 4 replicates of treatment and control; *P*-value, statistical differences of two groups through t-test. VIP: Variable Importance in the Projection by the use of PLS-DA model.

14  
15  
16
